# Supplementary material for: Physical health complications in children and young people with avoidant restrictive food intake disorder (ARFID): a systematic review and meta-analysis
Source: PubMed Central journal article supplement — BMJ Paediatr Open. 2024 Jul 8;8(1):e002595. doi: 10.1136/bmjpo-2024-002595 (PMC11261741; doi:10.1136/bmjpo-2024-002595), 2024-07-08
Supplement: bmjpo-2024-002595supp001.pdf [file bmjpo-2024-002595supp001.pdf]

## Supplemental File 1.

### *PubMed search strategy:*

(Avoidant restrictive food intake disorder” OR “Avoidant/restrictive food intake disorder” OR ARFID OR “Feeding disorder\*”[All Fields] OR “Food fussiness” [MeSH Terms] OR “Picky eating” OR (vomiting OR choking OR swallowing OR eating) ADJ2 (phobia OR fear)) OR "Phagophobia" OR "Sitophobia" OR "emetophobia" OR "functional dysphagia" OR "Fear of food" OR OR "sitophobia" OR "food neophobia" OR "food avoidance" OR "food resistance" OR "food refusal" OR "food rejection" OR "food aversion" OR "food selectivity")

AND

(Complications OR characteristics OR symptoms OR Growth OR weight OR BMI OR Cardi\* OR blood OR Nutritional Status OR Malnutrition (MeSH) OR Dietary Supplements (MeSH) OR Enteral Nutrition (MeSH) OR Anaemia OR Puberty OR Amenorrhea OR menstruation OR Bone OR Gastrointest\*)

Filters: Human, “All Clinical studies”, “Case reports”, “Reviews, Meta-Analysis and Systematic Reviews”

### *Web of science search strategy:*

("Avoidant restrictive food intake disorder" OR "Avoidant/restrictive food intake disorder" OR ARFID OR "Feeding Disorder\*" [All Fields] OR "Food fussiness" OR "Fussy Eating" OR “Picky eating” OR (vomiting OR choking OR swallowing OR food) NEAR/2 (phobia OR fear) OR phagophobia OR sitophobia OR emetophobia OR "functional dysphagia" OR (food) NEAR/1 (avoidance OR resistance OR refusal OR rejection OR aversion OR selectivity OR neophobia))

AND

(Complications OR characteristics OR symptoms OR Growth OR weight OR BMI OR Cardi\* OR blood OR Nutritional Status OR Malnutrition OR undernutrition OR "nutritional deficienc\*" OR malnourishment OR dietary supplement\* OR "food supplement\*" OR "Enteral nutrition" OR "enteral feeding" OR "force feeding" OR "Gastric feeding tubes" OR "tube feeding" OR Anaemia OR Puberty OR Amenorrhea OR menstruation OR Bone OR Gastrointest\*)

Filters: Human, Review Article, Article

### *PyschINFO and Embase search strategy:*

(Avoidant restrictive food intake disorder”.sh OR “Feeding disorder\*” OR “Food fussiness” OR “Fussy eating” OR “Picky eating” OR ((vomiting OR choking OR swallowing OR food) ADJ2 (phobia OR fear)) "Phagophobia" OR "Sitophobia" OR "emetophobia" OR "functional dysphagia" OR (food ADJ (avoidance OR resistance OR refusal OR rejection OR aversion OR selectivity OR neophobia)

AND

(Complications OR characteristics OR symptoms OR Growth OR weight OR BMI OR Cardi\* OR blood OR "Nutritional Status".sh OR Malnutrition.sh OR "Dietary Supplements".sh OR "Enteral Nutrition".sh OR Anaemia OR Puberty OR Amenorrhea OR menstruation OR Bone OR Gastrointest\*)

Filters: Human, Article

*Cochrane search strategy:*

("Avoidant restrictive food intake disorder" OR "Avoidant/restrictive food intake disorder" OR ARFID OR "Feeding Disorders" OR "Food fussiness" OR "Fussy eating" OR "Picky eating" OR "choking phobia" OR "phagophobia" OR "fear of choking" OR "fear of swallowing" OR "swallowing phobia" OR "vomiting phobia" OR "fear of vomiting" OR "emetophobia" OR "functional dysphagia" OR "fear of food" OR "fear of eating" OR "sitophobia" OR "food neophobia" OR "food avoidance" OR "food resistance" OR "food refusal" OR "food rejection" OR "food aversion" OR "food selectivity")

AND

(Complication\* OR characteristic\* OR symptom\* OR Growth OR weight OR BMI OR Cardi\* OR blood OR "Nutritional Status" OR Malnutrition OR undernutrition OR "nutritional deficienc\*" OR malnourishment OR "dietary supplement\*" OR "Enteral nutrition" OR Amenorrhea OR puberty OR menstruation OR Bone OR Gastrointest\*)

Filters: none
